# Supplementary material
Source: PubMed Central journal article supplement (PMC4850101)

## Supplemental Figure I

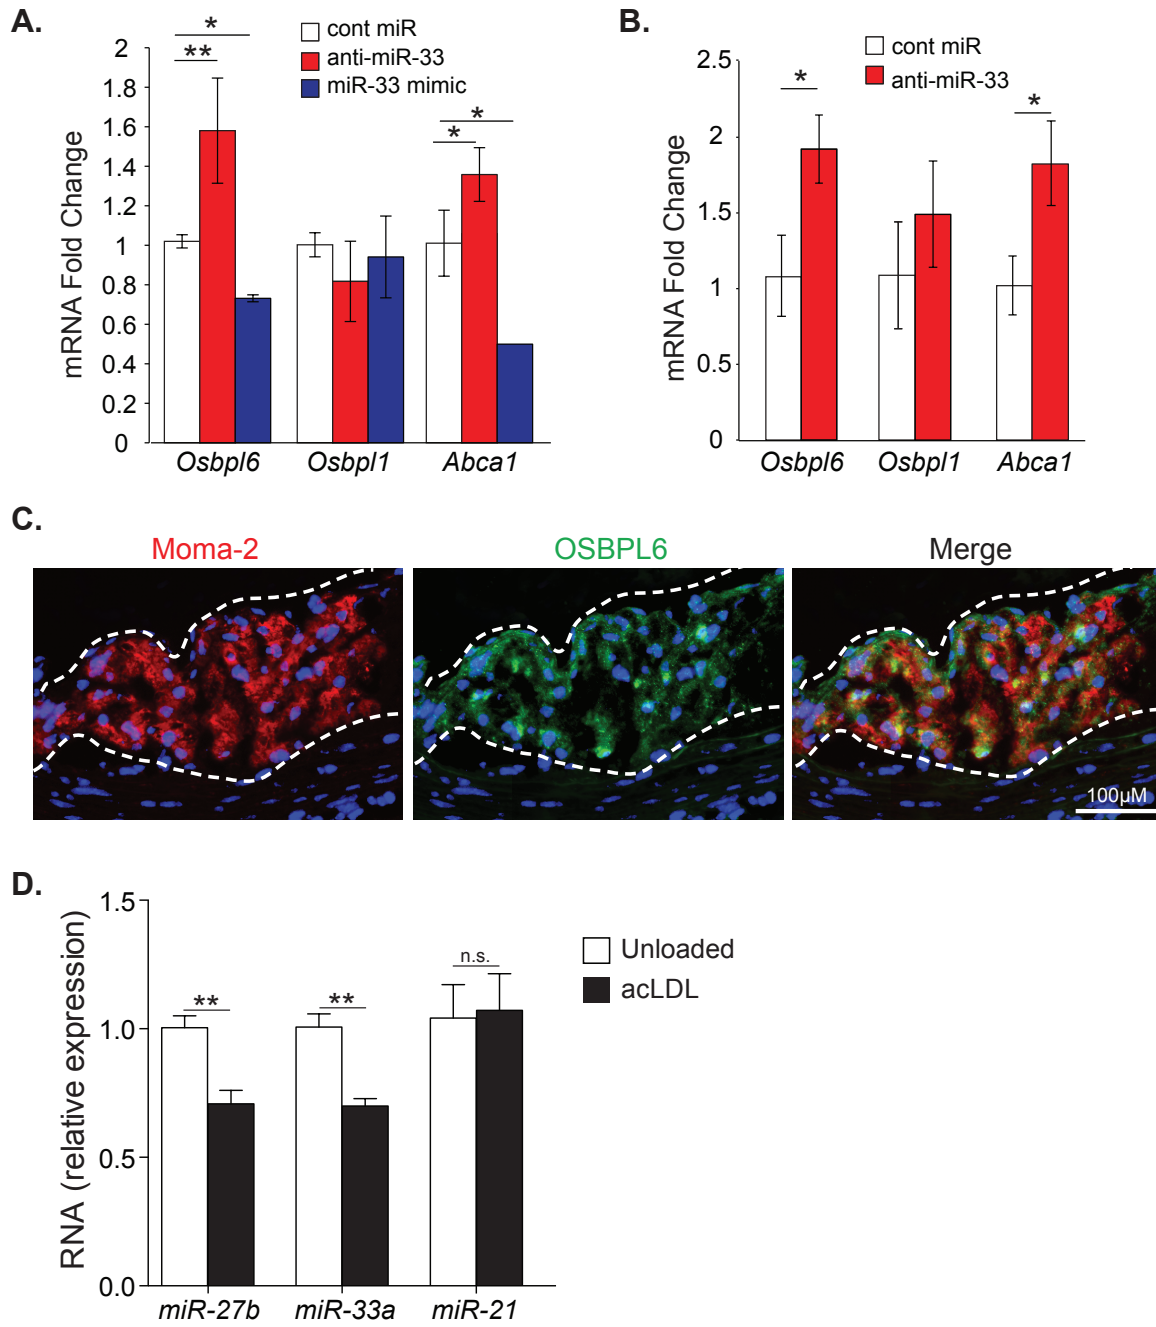

## Supplemental Figure II

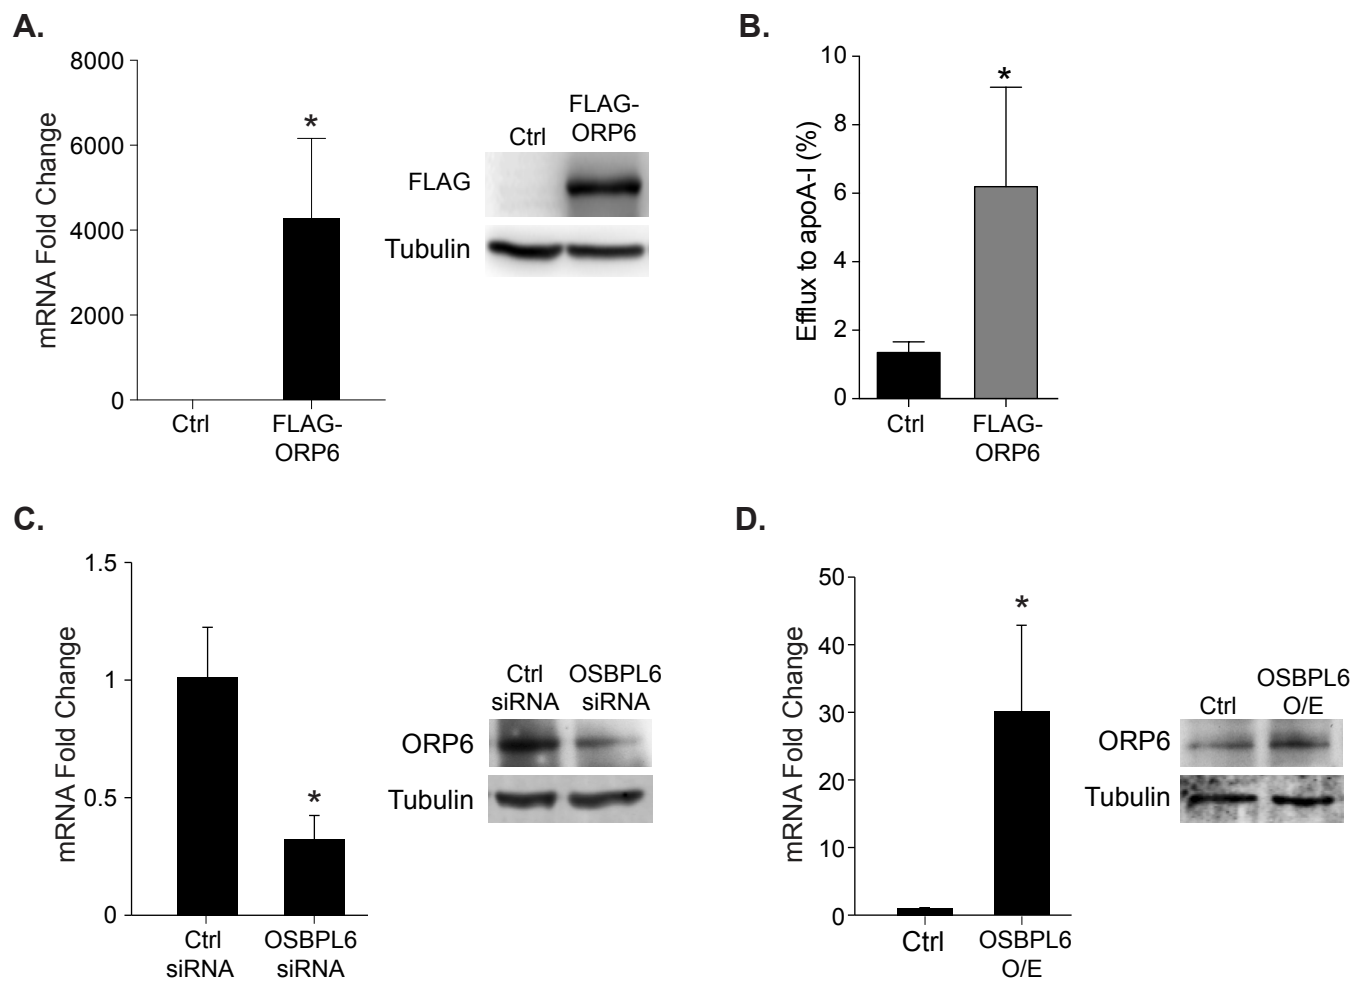

Supplemental Figure III

A.

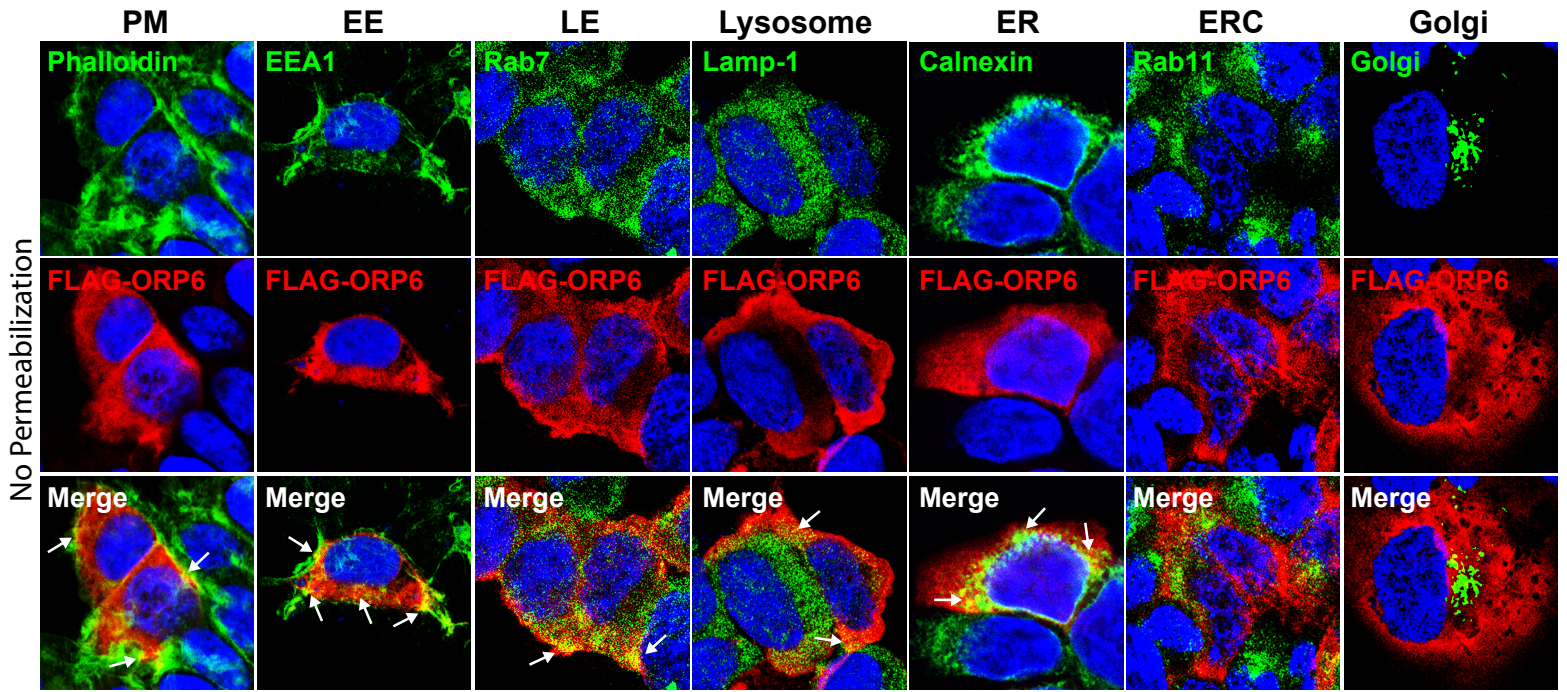

B.

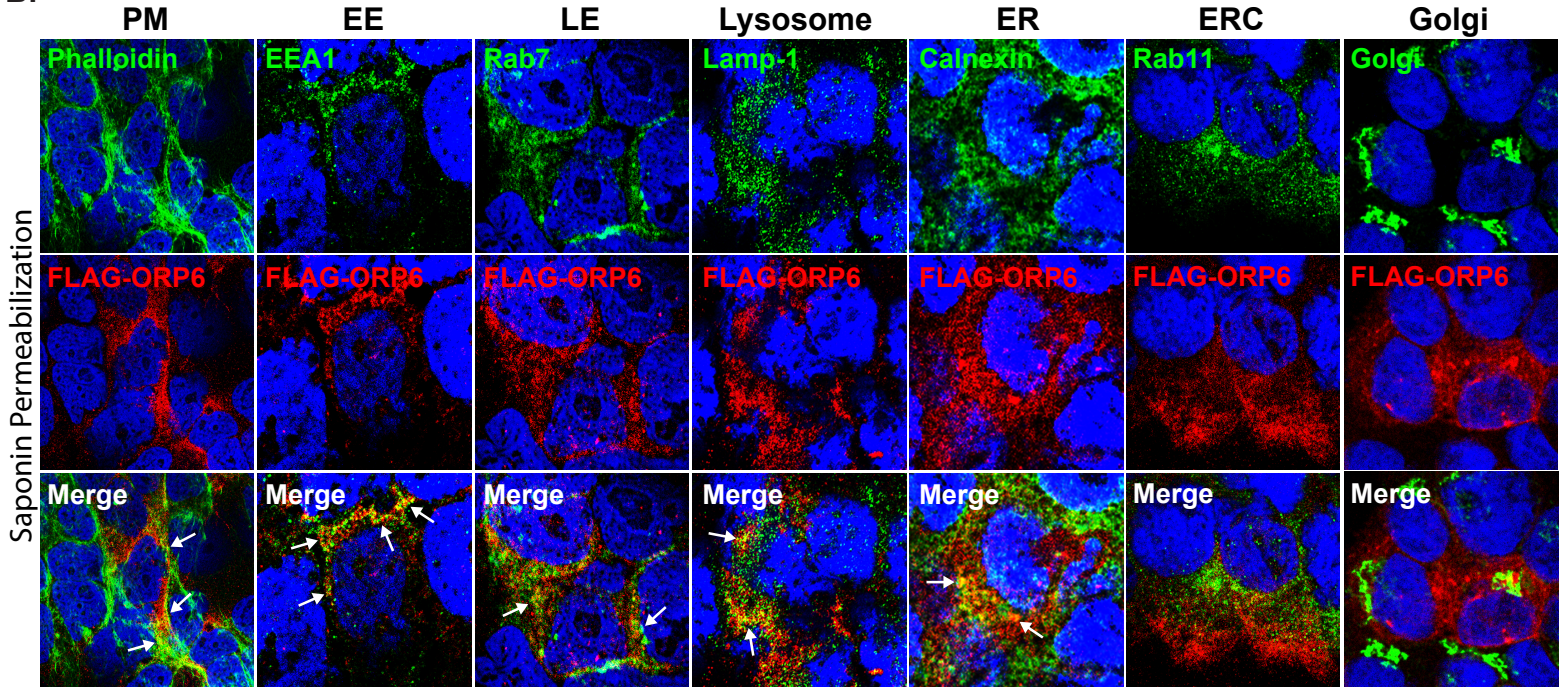

## Supplemental Figure IV

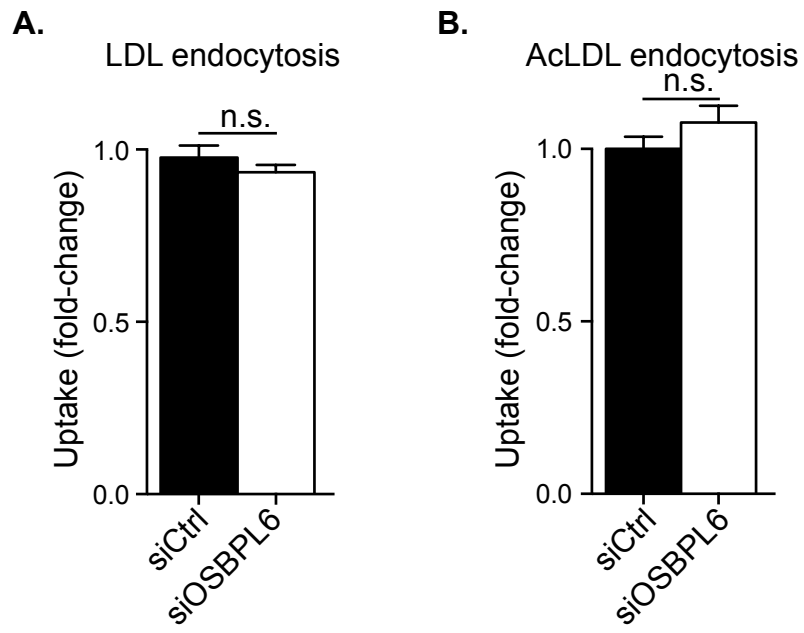



Supplemental Figure V

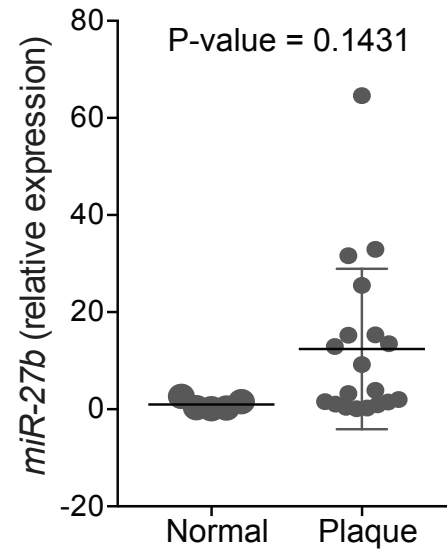

Supplement: NIHMS762626-supplement-Supplemental_Material.pdf [file NIHMS762626-supplement-Supplemental_Material.pdf]
